# Supplementary material for: Genome-wide identification and characterization of circular RNA m6A modification in pancreatic cancer
Source: PubMed Central journal article supplement (PMC8605608; doi:10.1186/s13073-021-01002-w), 2021-11-19
Supplement: 13073_2021_1002_MOESM1_ESM.pdf [file 13073_2021_1002_MOESM1_ESM.pdf]

Additional file 1:  
Supplementary Materials for

**Genome-wide identification and characterization of circular RNA m<sup>6</sup>A  
modification in pancreatic cancer**

Ying Ye<sup>1,†</sup>, Weiyi Feng<sup>1,†</sup>, Jialiang Zhang<sup>1,†</sup>, Kaiyu Zhu<sup>1</sup>, Xudong Huang<sup>1</sup>, Ling Pan<sup>1</sup>, Jiachun Su<sup>1</sup>, Yanfen Zheng<sup>1</sup>, Rui Li<sup>1</sup>, Shuang Deng<sup>1</sup>, Ruihong Bai<sup>1</sup>, Lisha Zhuang<sup>1</sup>, Lusheng Wei<sup>2</sup>, Junge Deng<sup>1</sup>, Mei Li<sup>3</sup>, Rufu Chen<sup>4</sup>, Dongxin Lin<sup>1,5,6,\*</sup>, Zhixiang Zuo<sup>1,\*</sup>, Jian Zheng<sup>1,6,\*</sup>

<sup>†</sup>These authors contributed equally to this work.

\*Correspondence should be addressed to Prof. Jian Zheng (zhengjian@sysucc.org.cn), Prof. Zhixiang Zuo (zuozhx@sysucc.org.cn) or Prof. Dongxin Lin (lindx@sysucc.org.cn) at Sun Yat-sen University Cancer Center, Guangzhou, China

**This PDF file includes:**

Fig. S1 to Fig. S6

Table S1 to Table S5

Ye et al. Fig. S1

**A**

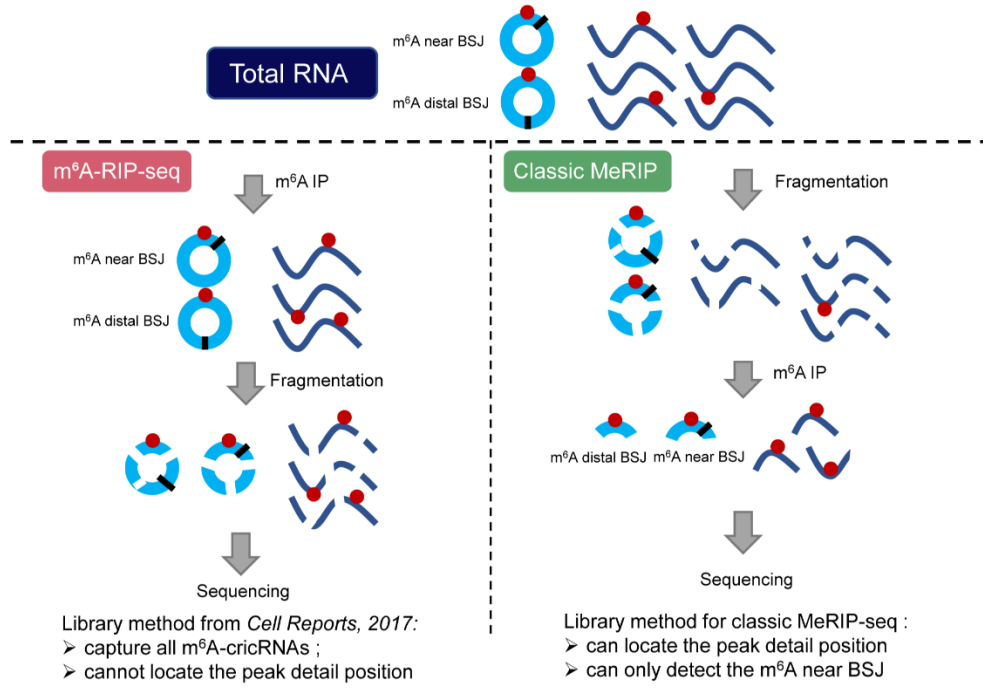

**B**

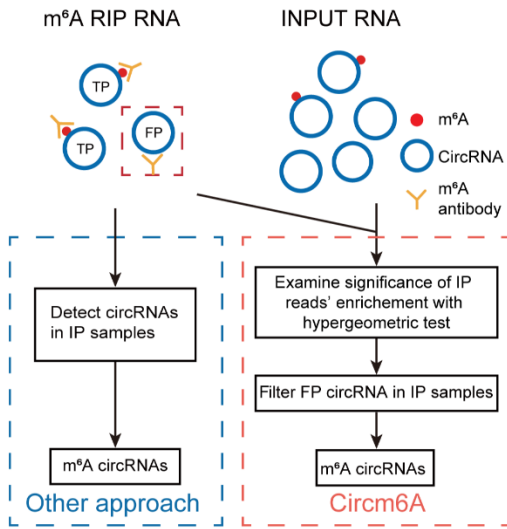

**C**

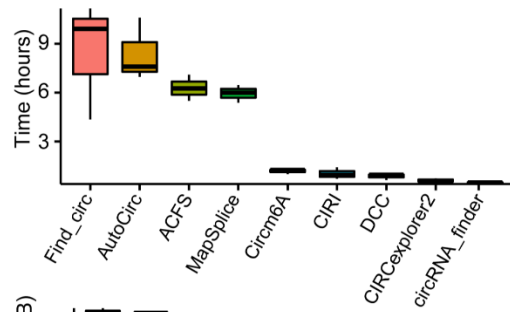

**D**

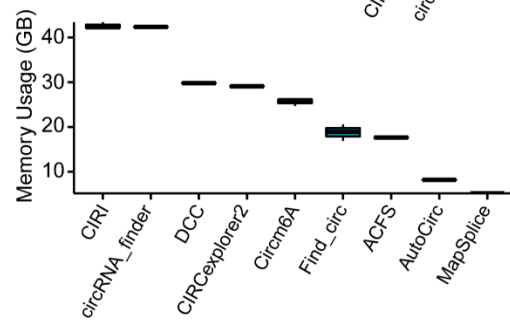

**Fig. S1.** Additional figures related to Fig. 2. **(A)** Two MeRIP-seq library construction strategies. Left panel shows strategy of fragmentation of RNA after m<sup>6</sup>A antibody IP (MeRIP). Right panel shows strategy of fragmentation of RNA before MeRIP. **(B)** Left panel shows the m<sup>6</sup>A-circRNA identification strategy that directly detected circRNAs in the m<sup>6</sup>A IP sample and defined them as m<sup>6</sup>A-circRNAs. Right panel shows the strategy used in Circm6A. TP, true positive; FP, false positive. **(C)** The Time consumption of Circm6A and other nine tools in predicting m<sup>6</sup>A-circRNAs with simulated MeRIP-seq datasets (N = 3). **(D)** Memory usage of Circm6A and nine other tools.

Ye et al. Fig. S2

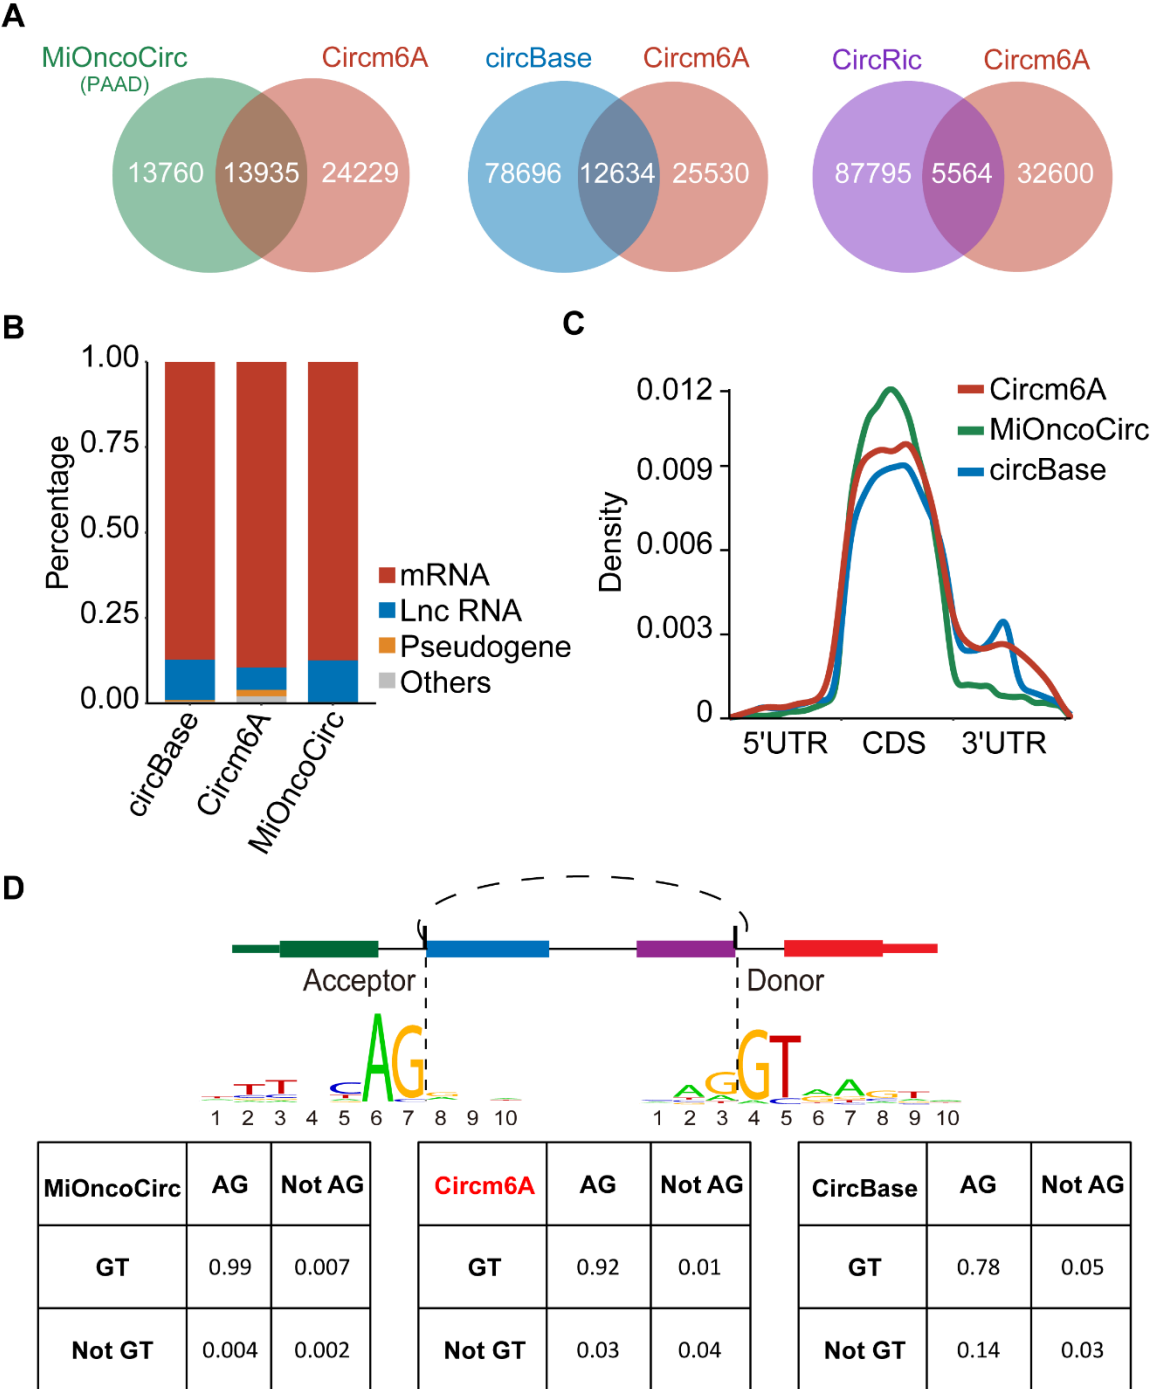

**Fig. S2.** Characteristics of circRNAs in PDAC. **(A)** Overlap of Circm6A-identified circRNAs with those circRNAs identified by the MiOncoCirc (from pancreatic cancer tissues), circBase databases and CircRic. **(B-C)** Distribution of host genes and the metagene plot for circRNAs in PDAC and the two known databases. **(D)** Upper panel: circular RNA was predominantly flanked by a canonical splicing motif, AG-GT (99.2%). Lower panel: statistics table for splicing motifs of circRNAs in PDAC and the two known databases.

Ye et al. Fig. S3

A

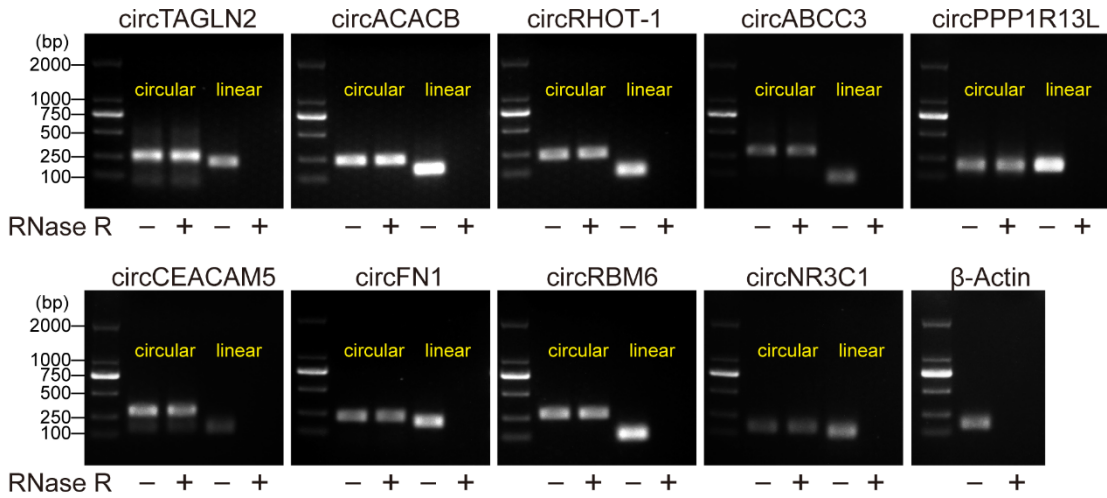

B

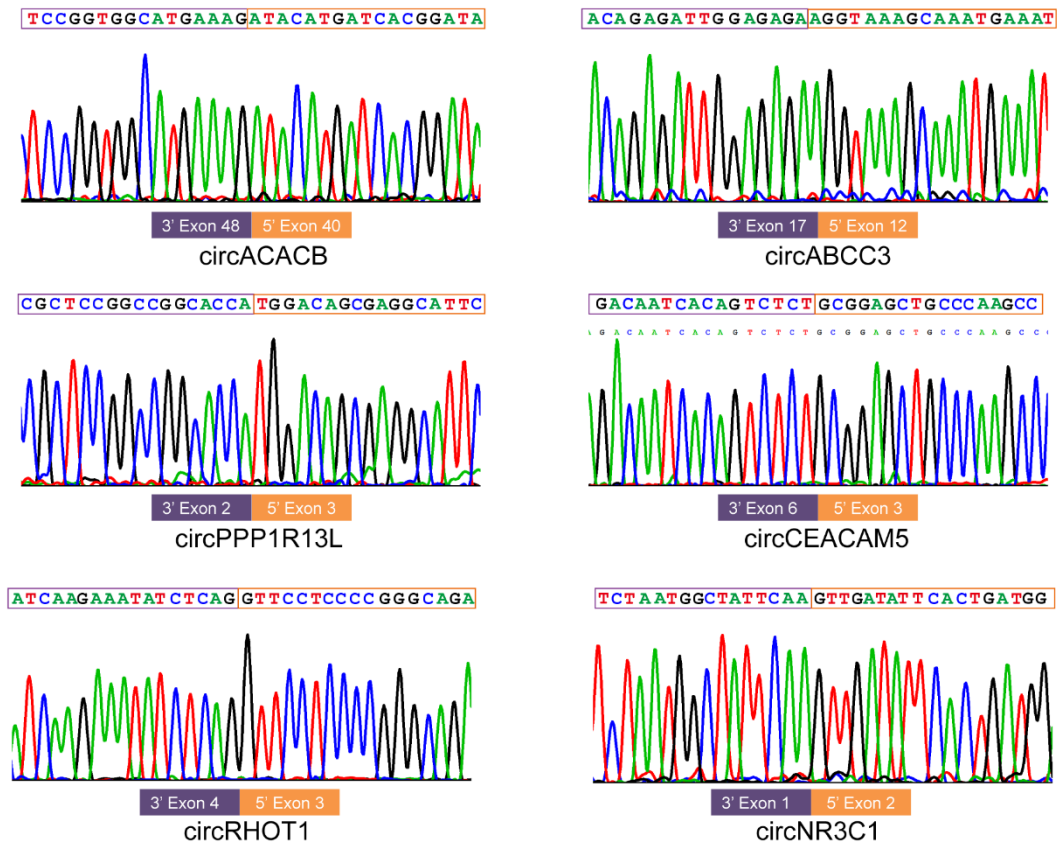

**Fig. S3.** Validation of circRNAs identified by Circm6A in PDAC. **(A)** Validation of 9 candidate circRNAs with qRT-PCR in PDAC tissue samples after RNase R treatment. **(B)** Sanger sequencing of the PCR product by divergent primers targeting the junction sites of the selected circRNAs to confirm back-splice sequences. The junction between the purple region and the orange region indicates the “head-to-tail” splicing site.

# Ye et al. Fig. S4

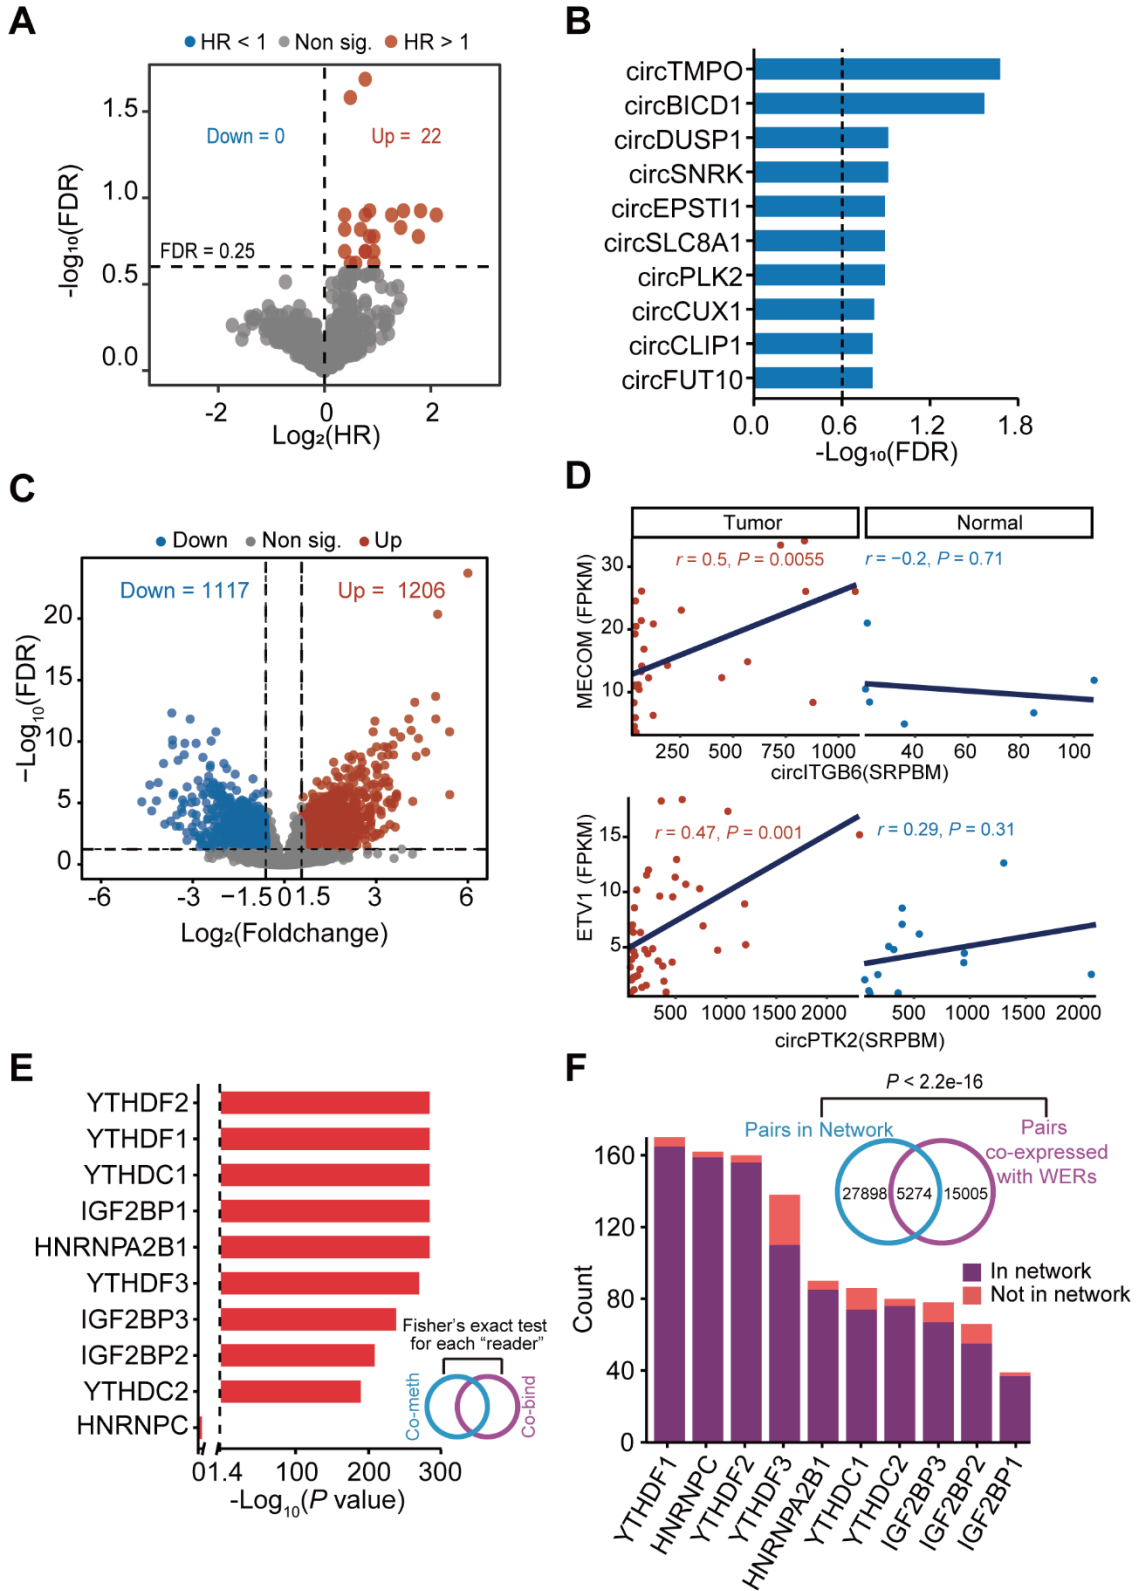



**Fig. S4.** Additional figures related to **Fig. 4.** **(A-B)** The correlation between OS and m<sup>6</sup>A level of differentially methylated m<sup>6</sup>A-circRNAs in PDAC. Volcano plot depicting log<sub>2</sub> hazard ratios (HRs) and -log<sub>10</sub> (FDR) values of differentially methylated m<sup>6</sup>A-circRNAs in the Cox proportional hazards model of OS. The horizontal dashed line in **(A)** and vertical dashed line in **(B)** correspond to an FDR = 0.25. Top 10 m<sup>6</sup>A-circRNAs significantly associated with OS were showed in B. **(C)** Volcano plot for differential expression analysis of mRNAs between PDAC tumor and normal tissues. The horizontal dashed line corresponds to an FDR = 0.05. The vertical dashed line corresponds to a fold change  $\geq 1.5$  (upregulation) and a fold change  $\leq -1.5$  (downregulation). **(D)** Additional examples for the gain of co-expression in PDAC tumor compared to normal tissue samples. **(E)** Top m<sup>6</sup>A “readers” that tend to bind co-methylated pairs (both the circRNA and mRNA were m<sup>6</sup>A-modified in the coexpression network). Co-bind infer that a “reader” bind to both circRNA and DEmRNA of a pair. The *P* value was calculated with Fisher’s exact test. **(F)** Significant overlap between circRNA-mRNA pairs in the co-expression network and circRNA-mRNA pairs correlated with m<sup>6</sup>A “readers”. Counts of m<sup>6</sup>A reader correlated mRNAs in the circRNA-mRNA co-expression network.

Ye et al. Fig. S5

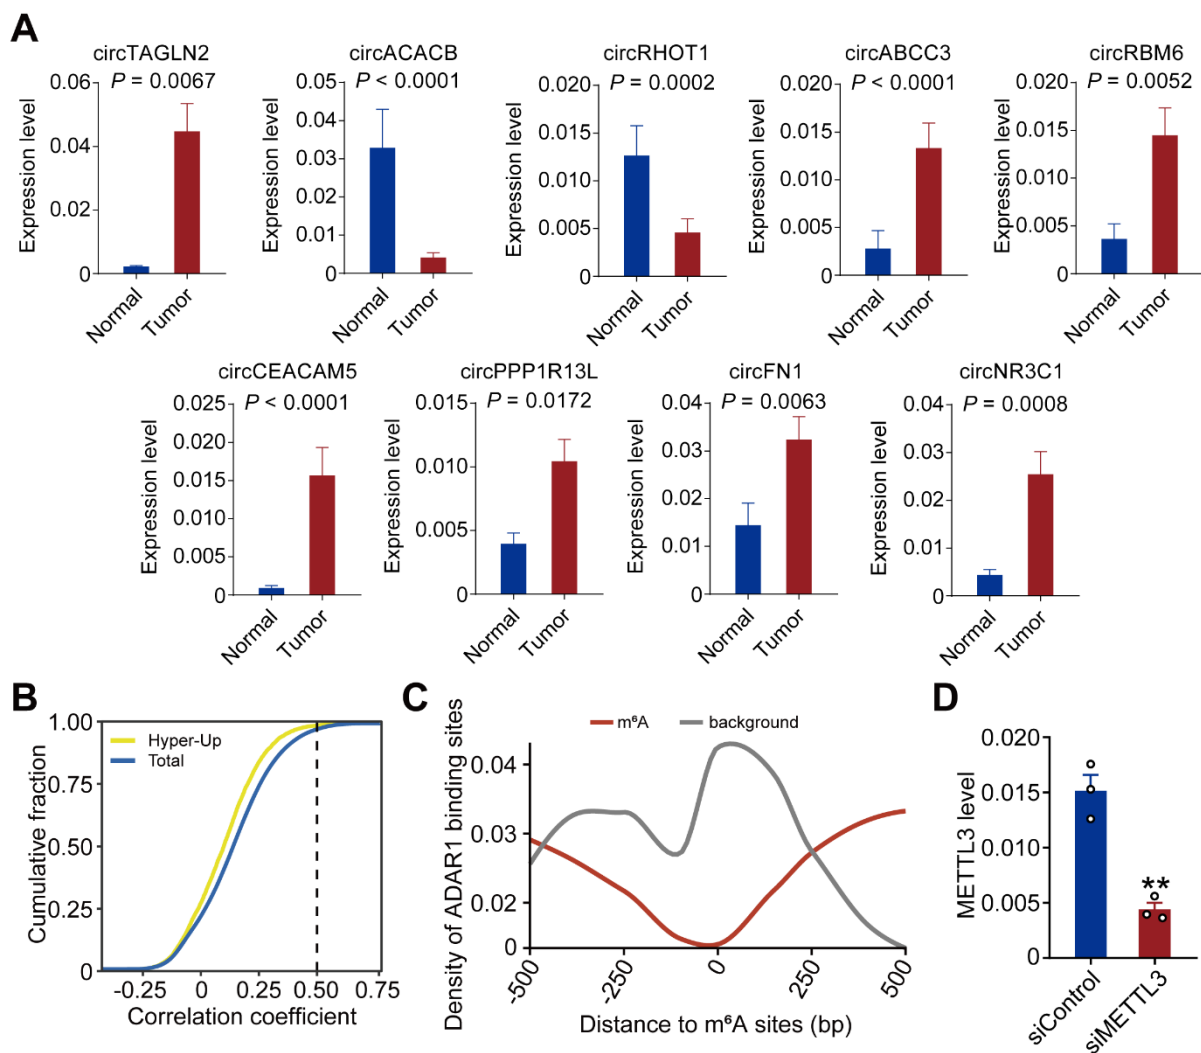

**Fig. S5.** Additional figures related to **Fig. 5.** (A) Validation of the differential expression of 9 circRNAs with qRT-PCR after RNase R treatment. (B) The plot of the cumulative density function (CDF) for the correlation coefficients between the expression levels of hyper-up circRNAs and “readers”, and the correlation coefficients between all circRNAs was background. (C) The distribution of binding sites for ADAR1 in the flanking regions (500 nt) around the m<sup>6</sup>A peak center was gradually decreased, compared with background (generated by the shuffleBed

function of the Bedtools). **(D)** METTL3 knockdown in PANC-1 cell was confirmed by qRT-PCR.

Ye et al. Fig. S6

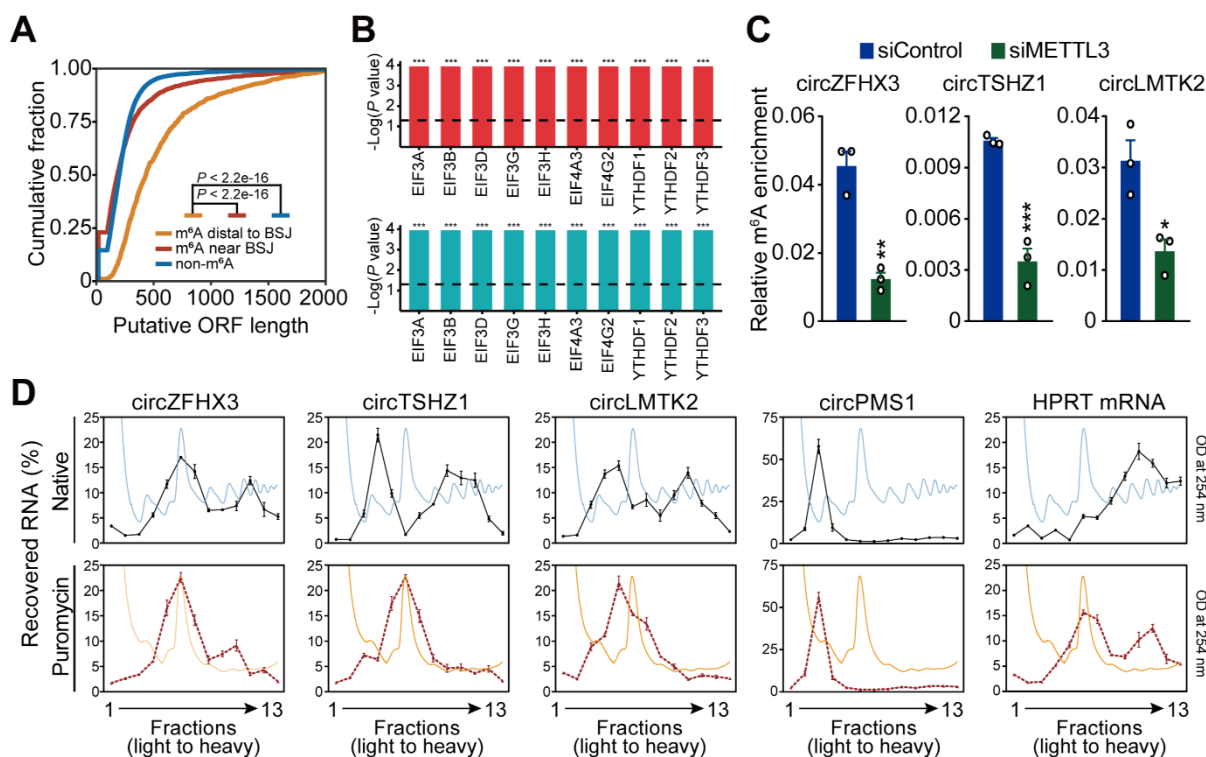

**Fig. S6.** Additional figures related to **Fig. 6.** (A) ORF length of BSJ-distal m<sup>6</sup>A-circRNAs, BSJ-proximal m<sup>6</sup>A-circRNAs and non-m<sup>6</sup>A-circRNAs. (B) Bar plot showed the  $-\log_{10}(P \text{ value})$  of permutation test for the preferential binding of Eukaryotic initiation factors (EIFs) and YTHDF1,2,3 to BSJ-distal m<sup>6</sup>A-circRNAs over BSJ-proximal m<sup>6</sup>A-circRNAs (upper panel; red bars) and BSJ-distal m<sup>6</sup>A-circRNAs over non-m<sup>6</sup>A-circRNAs (bottom panel; blue bars). n.s.,  $P > 0.05$ ; \*,  $P \leq 0.05$ ; \*\*,  $P < 0.01$ ; \*\*\*,  $P < 0.001$ . (C) Significant reduction of m<sup>6</sup>A methylation on indicated circRNAs were observed after METTL3 knockdown in PANC-1 cells cells (n = 3). (D) Cytoplasmic extracts from PANC-1 cells, either untreated (native, upper) or treated with puromycin (under), were loaded on 15%–50% sucrose gradients. Absorbance at 253 nm was measured and fractions were collected. Fraction density decreases from left to right. Individual

fractions were analyzed by qRT-PCR and are represented as a percentage of total RNA in each fraction. CircPMS1 and HPRT mRNA represent negative and positive controls, respectively.

**Table S1.** Baseline demographic and clinical characteristics of individuals with PDAC in this Study.

| Sample ID | Neural invasion | Vascular invasion | Lymph node metastasis | Tumor stage <sup>1</sup> | Tumor tissue | Normal tissue | Remarks |
|-----------|-----------------|-------------------|-----------------------|--------------------------|--------------|---------------|---------|
| PDAC_1    | No              | No                | No                    | II                       | Yes          | NA            |         |
| PDAC_2    | No              | No                | No                    | III                      | NA           | Yes           |         |
| PDAC_3    | Yes             | Yes               | Yes                   | II                       | NA           | Yes           |         |
| PDAC_4    | No              | No                | No                    | II                       | NA           | Yes           |         |
| PDAC_5    | Yes             | No                | Yes                   | II                       | Yes          | NA            |         |
| PDAC_6    | No              | No                | No                    | I                        | Yes          | NA            |         |
| PDAC_7    | Yes             | No                | Yes                   | II                       | NA           | Yes           |         |
| PDAC_8    | No              | No                | Yes                   | II                       | Yes          | NA            |         |
| PDAC_9    | No              | No                | No                    | III                      | Yes          | NA            |         |
| PDAC_10   | No              | No                | No                    | I                        | Yes          | NA            |         |
| PDAC_11   | No              | No                | No                    | I                        | Yes          | Yes           | Paired  |
| PDAC_12   | Yes             | No                | No                    | II                       | Yes          | NA            |         |
| PDAC_13   | Yes             | No                | Yes                   | II                       | Yes          | NA            |         |
| PDAC_14   | No              | No                | Yes                   | II                       | NA           | Yes           |         |
| PDAC_15   | No              | No                | No                    | II                       | Yes          | NA            |         |
| PDAC_16   | No              | No                | No                    | IV                       | Yes          | NA            |         |
| PDAC_17   | Yes             | No                | No                    | II                       | Yes          | Yes           | Paired  |
| PDAC_18   | Yes             | Yes               | No                    | II                       | Yes          | Yes           | Paired  |
| PDAC_19   | No              | No                | Yes                   | II                       | Yes          | NA            |         |
| PDAC_20   | Yes             | Yes               | No                    | II                       | Yes          | NA            |         |
| PDAC_21   | Yes             | Yes               | Yes                   | II                       | Yes          | NA            |         |
| PDAC_22   | No              | No                | Yes                   | II                       | Yes          | NA            |         |
| PDAC_23   | Yes             | Yes               | Yes                   | IV                       | Yes          | NA            |         |
| PDAC_24   | No              | No                | Yes                   | II                       | Yes          | NA            |         |
| PDAC_25   | No              | Yes               | Yes                   | II                       | Yes          | Yes           | Paired  |
| PDAC_26   | No              | No                | No                    | II                       | Yes          | Yes           | Paired  |
| PDAC_27   | Yes             | No                | No                    | II                       | Yes          | NA            |         |
| PDAC_28   | Yes             | No                | Yes                   | II                       | Yes          | Yes           | Paired  |
| PDAC_29   | No              | No                | Yes                   | II                       | Yes          | NA            |         |
| PDAC_30   | Yes             | No                | Yes                   | II                       | Yes          | Yes           | Paired  |
| PDAC_31   | No              | No                | Yes                   | II                       | Yes          | Yes           | Paired  |
| PDAC_32   | No              | No                | Yes                   | II                       | Yes          | Yes           | Paired  |
| PDAC_33   | Yes             | No                | Yes                   | II                       | Yes          | Yes           | Paired  |
| PDAC_34   | No              | No                | No                    | I                        | Yes          | NA            |         |
| PDAC_35   | Yes             | No                | Yes                   | II                       | Yes          | NA            |         |
| PDAC_36   | No              | No                | No                    | I                        | Yes          | NA            |         |
| PDAC_37   | Yes             | Yes               | No                    | II                       | Yes          | NA            |         |

|         |     |     |     |     |     |     |        |
|---------|-----|-----|-----|-----|-----|-----|--------|
| PDAC_38 | No  | Yes | No  | IV  | Yes | Yes | Paired |
| PDAC_39 | No  | No  | No  | IV  | Yes | Yes | Paired |
| PDAC_40 | No  | No  | Yes | II  | Yes | NA  |        |
| PDAC_41 | Yes | Yes | Yes | II  | Yes | Yes | Paired |
| PDAC_42 | Yes | No  | No  | II  | Yes | Yes | Paired |
| PDAC_43 | No  | No  | No  | III | Yes | NA  |        |
| PDAC_44 | No  | No  | No  | II  | Yes | NA  |        |
| PDAC_45 | No  | No  | Yes | II  | Yes | Yes | Paired |
| PDAC_46 | No  | No  | No  | II  | Yes | Yes | Paired |
| PDAC_47 | Yes | No  | Yes | II  | Yes | NA  |        |
| PDAC_48 | Yes | Yes | Yes | II  | Yes | NA  |        |
| PDAC_49 | No  | No  | No  | II  | Yes | NA  |        |
| PDAC_50 | Yes | Yes | Yes | II  | Yes | Yes | Paired |
| PDAC_51 | No  | No  | Yes | II  | Yes | NA  |        |
| PDAC_52 | Yes | No  | Yes | IV  | Yes | NA  |        |
| PDAC_53 | No  | No  | No  | III | Yes | NA  |        |
| PDAC_54 | No  | No  | No  | IV  | Yes | NA  |        |
| PDAC_55 | No  | No  | No  | I   | Yes | Yes | Paired |
| PDAC_56 | No  | Yes | No  | II  | Yes | NA  |        |
| PDAC_57 | No  | No  | No  | IV  | Yes | NA  |        |
| PDAC_58 | No  | No  | No  | IV  | Yes | NA  |        |

---

<sup>1</sup>Tumor TNM staging were reviewed by at least 3 pathologists and defined according to the American Joint Committee on Cancer (AJCC) 7th edition.

**Table S2.** The primers sequences used in this study.

| <b>Primers for circRNA MeRIP-qPCR and quantitative real time-PCR</b> |                            |                               |
|----------------------------------------------------------------------|----------------------------|-------------------------------|
| Gene symbol                                                          | Forward primer (5'→3')     | Reverse primer (5'→3')        |
| <i>circTAGLN2</i>                                                    | TGAGAACACTCCCTGTCCCAA      | CCATATGCAGGTCCCCTGTT          |
| <i>circACACB</i>                                                     | TCCTCCCAGCGGATTCACTA       | AACATGGTCAGAGACTGCCG          |
| <i>circRHOT1</i>                                                     | CTACTTGGACTGTGCTTCGAC      | AGTGCAATCAGGAGGTATTTTCAG<br>C |
| <i>circABCC3</i>                                                     | ATTCCAACCAACGGAGCTGTG      | GCGCGAGTCCTTCAATTTTCAT        |
| <i>circCEACAM5</i>                                                   | AAGAAATGACGCAAGAGCCTATG    | CCCGAAAGGTAAGACGAGTCTG        |
| <i>circPPP1R13L</i>                                                  | GAAAGCCTGGAACGAGTCTGA      | GCGCTAGTGAGGTTGTCCT           |
| <i>circFNI</i>                                                       | GAGAATAAGCTGTACCATCGCAA    | CGACCACATAGGAAGTCCCAG         |
| <i>circCPB1</i>                                                      | ACCAAGTACACATATGGCCCCG     | CAGGACGTAGCTGGCAACATA         |
| <i>circRBM6</i>                                                      | GGGAAGGGCCAACTTTCCG        | TGGAACGATAGATACGCTTTAGC       |
| <i>circNR3C1</i>                                                     | ATAGCTCTGTTCCAGACTCAACT    | ATCCAGGTGTAAGTTCCTGAAACC<br>T |
| <i>circFCHO2</i>                                                     | TGTATTGTGAAGATCACTGGTGATA  | TAAGTTGGTGGGATCTGCTCCTT       |
| <i>circPOSTN</i>                                                     | GTCTCCTGTCTGATTTTAGCCA     | AATAAATGACCATCACCACCTT        |
| <i>circVTI1A</i>                                                     | ACATCTGCTCGATAACACAGA      | TCTCTGAGGAATTCATCAT           |
| <i>circPEAK1</i>                                                     | ATGCATTACTACAGGACTCAG      | CTATGTGTTACAGCAGCTCT          |
| <i>circPTPRH</i>                                                     | ACATCACCGTGGATAGACTTG      | GAGATGGAGCTGGTGGTCTGA         |
| <i>circZFH3</i>                                                      | CAGTTCATGATGAGCGGATT       | GTCACAGCCTCCATGGTAA           |
| <i>circTSHZ1</i>                                                     | ACTGCACCTTAGTAAGACCCA      | CTCCTCGTGTCTTCATCTAT          |
| <i>circ-LMTK2</i>                                                    | AGAAGGAAAAGAAGGCAGTCA      | ACTTGGTTGAGGACATCTAAGT        |
| <i>β-Actin</i>                                                       | CAGGGCGTGATGGTGGGCATG      | GTAGAAGGTGTGGTGCCAGATT        |
| <b>Primers for mRNA quantitative real time-PCR</b>                   |                            |                               |
| <i>TAGLN2</i>                                                        | GAAGTCTCGGATAACCAGCTGCAA   | AGTTCCTGGAAGTTCTCGCGTCCA      |
| <i>ACACB</i>                                                         | TAATTCAGCAGGCAGGACAGGTGT   | ACGATCTCTTCGTAAGCCAGA         |
| <i>RHOT1</i>                                                         | ATAGAATTTAGCTTGCCATTAGT    | ATTAAATTAACCTACACCTTCAT       |
| <i>ABCC3</i>                                                         | ATCCAGAAGTGCCTCTTCAGGAA    | TGCCGAGCAGCTGGAGCTCA          |
| <i>CEACAM5</i>                                                       | TATTACCGTCCAGGGGTGAACCTCA  | ACAGGTGAAGGCCACAGCATCCTT      |
| <i>PPP1R13L</i>                                                      | ATGAAACACATGGATCTGAAGCAGA  | TCTGGAATGCCTCGCTGTCCAT        |
| <i>FNI</i>                                                           | TAAGTGAGGCTCACATGGACTTT    | ATGGGGCTTGTGCTCACTTACCTTC     |
| <i>CPB1</i>                                                          | TACTGATAAGCAACCTGAGAAATGT  | TAACTTACTTGTATTGTAGTTC        |
| <i>RBM6</i>                                                          | AGTCAAGGAAAGTCAAGTAGCAAG   | ACCTGTTACAGCCTACCTGATAGT      |
| <i>NR3C1</i>                                                         | ACTCTGAACTTCCCTGGTTCGAACAG | TTTATAGAAGTCCATCACATCTC       |
| <i>β-Actin</i>                                                       | CAGGGCGTGATGGTGGGCATG      | GTAGAAGGTGTGGTGCCAGATT        |
| <b>Primers for nascent pre-mRNA detection</b>                        |                            |                               |
| <i>pre-POSTN</i>                                                     | ATGGAATCAAATGGTGAACAA      | AAAAGTTGCTTACCAGAATCAGGA<br>A |
| <i>pre-VTI1A</i>                                                     | GATCACCAGCAAGATTGCGAGGGTC  | CACTTACTCGGGCGGGGTTCCA        |
| <i>pre-PEAK1</i>                                                     | TCAGGCTAACCAGTGACAAACC     | ATGAATCCATCCCAGTAACAAT        |
| <i>pre-PTPRH</i>                                                     | GTAGCCAGTTCCACGCAGAGCC     | TGAGCTAAGCCCAGTTCACCACT       |



|                    |                            |                         |
|--------------------|----------------------------|-------------------------|
| <i>pre-TAGLN2</i>  | CCAATTAAACACCCTAGCCAAGAAC  | CTGGAGTTACAATAGGCGGGAAA |
| <i>pre-CEACAM5</i> | TTCTACACCCTACACGTCATAAAGTC | ACTAAATGCCCAAACCCTAACA  |
| <i>pre-RBM6</i>    | GAGTCACGCTTAGGACATCAAA     | TGGTATGTGCCCTGACAAACTA  |

---

**Table S3.** Top 14 features for the construction of random forest model.

| Features                                       | Description                                                                                    | Additional information                                                          |
|------------------------------------------------|------------------------------------------------------------------------------------------------|---------------------------------------------------------------------------------|
| Exon count                                     | The count of exons per circRNA                                                                 |                                                                                 |
| Gene feature                                   | The genes feature that circRNA located in                                                      | 5'UTR,CDS,3'UTR,exon,intron                                                     |
| CircRNA SRPBM <sup>1</sup>                     | The expression level of circRNAs, normalized by SRPBM                                          |                                                                                 |
| Linear m <sup>6</sup> A peak                   | Whether linear counterpart RNAs <sup>2</sup> has a m <sup>6</sup> A peak within circRNA locus. | Yes or Not                                                                      |
| Linear peak number                             | The m <sup>6</sup> A peak count of linear counterpart RNAs within circRNA locus                | If Linear m <sup>6</sup> A peak = “Not” , the feature value is 0                |
| Free energy                                    | The free energy of each circRNA                                                                | The free energy is calculated by RNAfold (v2.4.13) package ( parameter: --circ) |
| Length                                         | The length of each circRNA                                                                     |                                                                                 |
| GC content                                     | The percentage of guanine (G) or cytosine (C) in circRNAs.                                     |                                                                                 |
| Max exon length                                | Length of the longest exon in circRNAs                                                         |                                                                                 |
| Exon length average                            | Average length of exons in circRNA                                                             |                                                                                 |
| RRACH motif <sup>3</sup>                       | Whether circRNA contain RRACH motif                                                            | Yes or Not                                                                      |
| TE <sup>4</sup> count in 5' splicing site (ss) | The number of Transposable elements in upstream 2000 bp of 5'ss                                |                                                                                 |
| TE count in 3' splicing site (ss)              | The number of Transposable elements in downstream 2000 bp of 3'ss                              |                                                                                 |
| House-keeping genes                            | Whether host gene of circRNA is a house-keeping gene .                                         | Yes or Not                                                                      |

<sup>1</sup>SRPBM, spliced reads per billion mapped reads, a normalization method for read count of circRNAs;

<sup>2</sup> linear counterpart RNAs: linear isoforms of host gene that also generate circRNA;

<sup>3</sup>RRACH motif: “RRACH” (R = G or A; H = A, C or U), the consensus motif of m<sup>6</sup>A modification;

<sup>4</sup>TE, Transposable elements.

**Table S4.** The performance of Circm6A in the identification of circRNAs on the simulated datasets.

| Method         | RNA-seq datasets <sup>1</sup> |                 |                   |                   |                       |
|----------------|-------------------------------|-----------------|-------------------|-------------------|-----------------------|
|                | Detected circRNAs             | TP <sup>2</sup> | S(%) <sup>3</sup> | P(%) <sup>4</sup> | F1 score <sup>5</sup> |
| <b>Circm6A</b> | <b>18554</b>                  | <b>18520</b>    | <b>98.70</b>      | <b>99.82</b>      | <b>0.99</b>           |
| ACFS           | 8445                          | 8448            | 45.01             | 99.96             | 0.62                  |
| AutoCirc       | 18265                         | 16564           | 88.28             | 90.69             | 0.89                  |
| CIRCexplorer2  | 18038                         | 18036           | 96.13             | 99.99             | 0.98                  |
| circRNA_finder | 17488                         | 17470           | 93.11             | 99.90             | 0.96                  |
| CIRI2          | 18484                         | 18441           | 98.28             | 99.77             | 0.99                  |
| DCC            | 18142                         | 18132           | 96.64             | 99.94             | 0.98                  |
| Find Circ      | 16741                         | 16592           | 88.43             | 99.11             | 0.93                  |
| MapSplice      | 16720                         | 16719           | 89.11             | 99.99             | 0.94                  |

<sup>1</sup>RNA-seq datasets were generated by in-house simulator to evaluate the performance of each method in detecting circRNAs.

<sup>2</sup>TP: True positive ratio;

<sup>3</sup>S: Sensitivity;

<sup>4</sup>P: Precision;

<sup>5</sup>F1 score =  $(2 \times \text{precision} \times \text{sensitivity}) / (\text{precision} + \text{sensitivity})$ .

**Table S5.** Compare the performance of Circm6A in the identification of m<sup>6</sup>A-circRNAs with other tools using simulated data

| Method                            | MERIP-seq datasets <sup>1</sup> |                 |                   |                   |                       |
|-----------------------------------|---------------------------------|-----------------|-------------------|-------------------|-----------------------|
|                                   | Detected circRNAs               | TP <sup>2</sup> | S(%) <sup>3</sup> | P(%) <sup>4</sup> | F1 score <sup>5</sup> |
| <b>Circm6A(high)<sup>6</sup></b>  | <b>1522</b>                     | <b>1511</b>     | <b>98.82</b>      | <b>99.28</b>      | <b>0.99</b>           |
| <b>Circm6A(total)<sup>7</sup></b> | <b>1885</b>                     | <b>1512</b>     | <b>98.89</b>      | <b>80.21</b>      | <b>0.89</b>           |
| ACFS                              | 905                             | 757             | 49.51             | 83.65             | 0.62                  |
| AutoCirc                          | 2870                            | 1503            | 98.30             | 52.37             | 0.68                  |
| CIRCexplorer2                     | 3005                            | 1527            | 99.87             | 50.82             | 0.67                  |
| circRNA_finder                    | 2873                            | 1484            | 97.06             | 51.65             | 0.67                  |
| CIRI2                             | 1933                            | 1522            | 99.54             | 78.74             | 0.88                  |
| DCC                               | 1865                            | 1529            | 100.00            | 81.98             | 0.90                  |
| Find Circ                         | 2678                            | 1481            | 96.86             | 55.30             | 0.70                  |
| MapSplice                         | 1644                            | 1486            | 97.19             | 90.39             | 0.94                  |

<sup>1</sup>MERIP-seq datasets were generated by in-house simulator to evaluate the performance of each method in detecting m<sup>6</sup>A-circRNAs.

<sup>2</sup>TP: True positive ratio;

<sup>3</sup>S: Sensitivity;

<sup>4</sup>P: Precision;

<sup>5</sup>F1 score =  $(2 \times \text{precision} \times \text{sensitivity}) / (\text{precision} + \text{sensitivity})$

<sup>6</sup>Circm6A(high): high confidence m<sup>6</sup>A-circRNAs of Circm6A.

<sup>7</sup>Circm6A(total): high and low confidence m<sup>6</sup>A-circRNAs of Circm6A.
