# Supplementary material for: Genome-wide identification and characterization of circular RNA m6A modification in pancreatic cancer
Source: PubMed Central journal article supplement (PMC8605608; doi:10.1186/s13073-021-01002-w), 2021-11-19

Uncropped blot for Fig. S3A

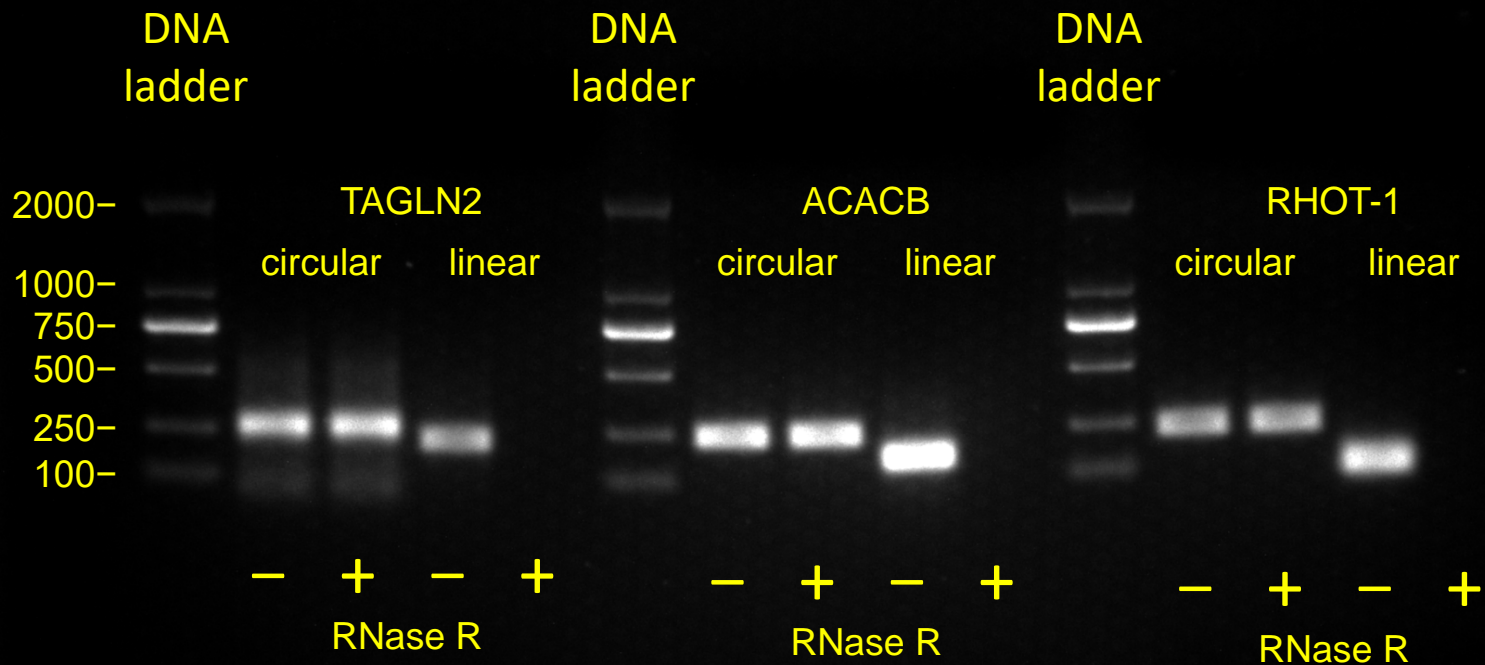

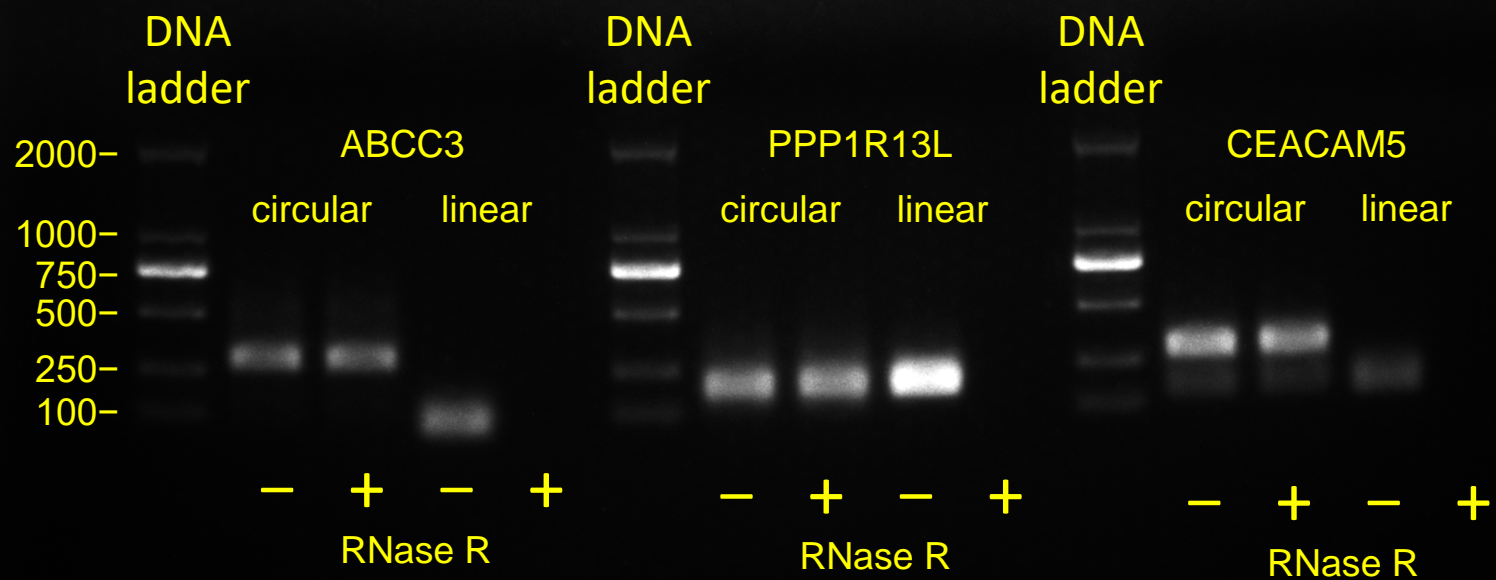

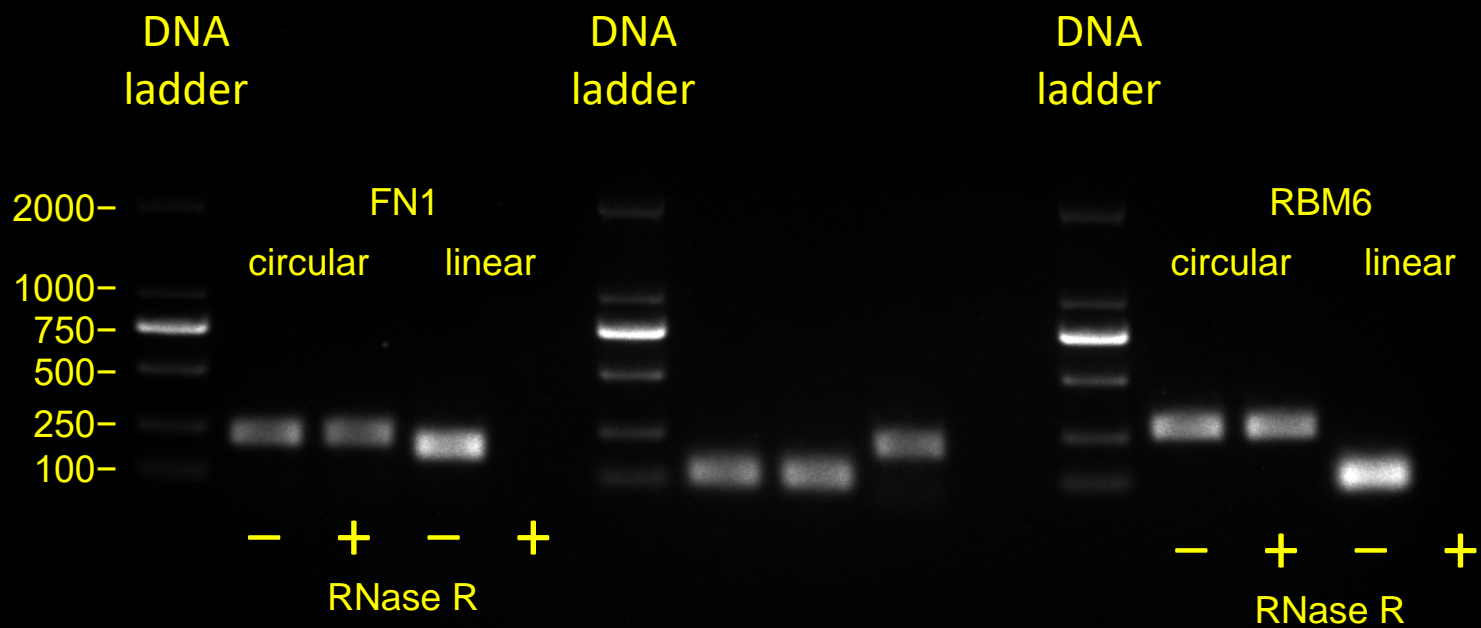

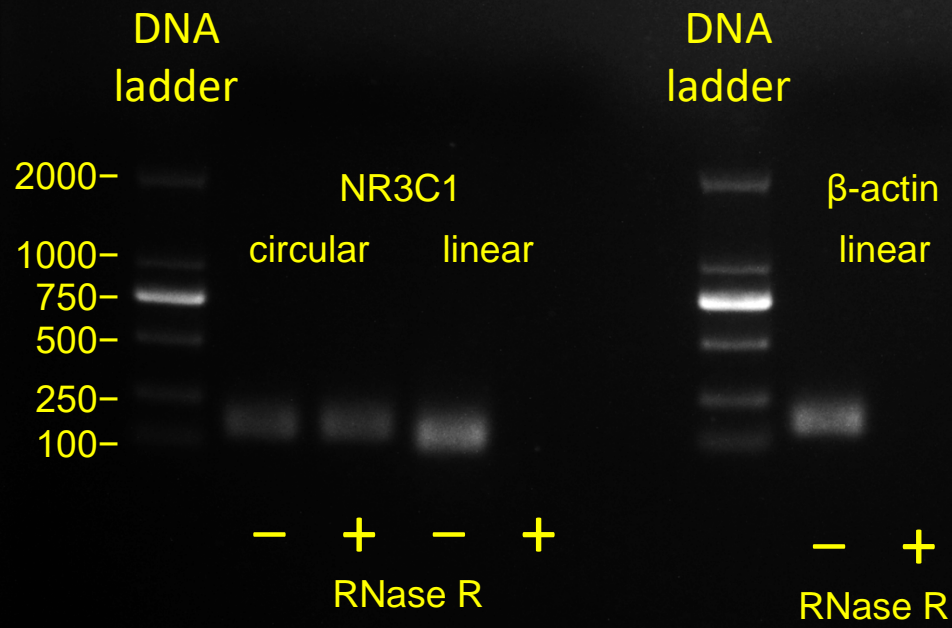

Uncropped blot for Fig. 3B

RNase R  
treated RNA

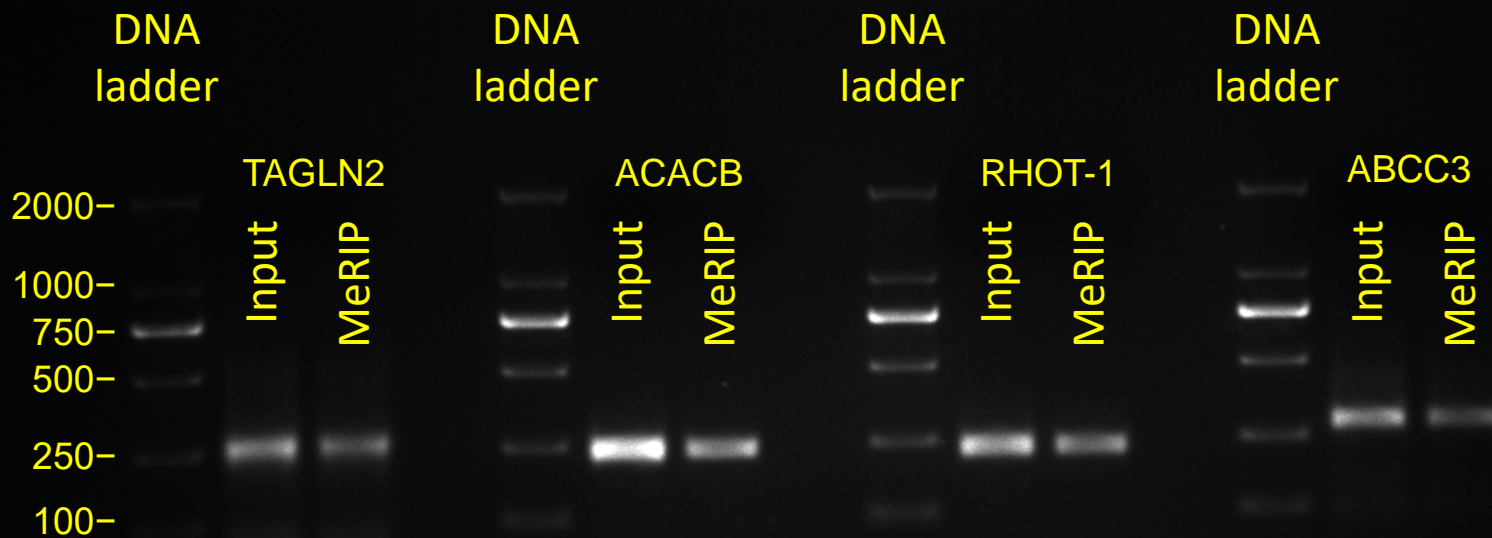







RNase R  
treated RNA

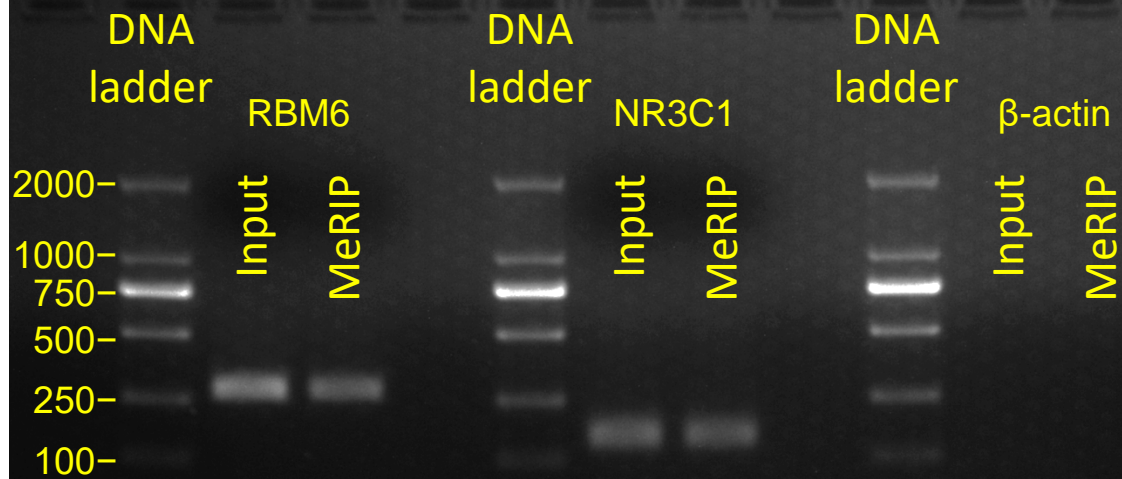

Supplement: 13073_2021_1002_MOESM4_ESM.pdf [file 13073_2021_1002_MOESM4_ESM.pdf]
